## The changing epidemiology of resistance

Peter M. Hawkey<sup>1,2\*</sup> and Annie M. Jones<sup>3</sup>

<sup>1</sup>Health Protection Agency, West Midlands Public Health Laboratory, Heart of England NHS Foundation Trust, Birmingham B5 9SS, UK; <sup>2</sup>School of Immunology and Infection, University of Birmingham, Edgbaston, Birmingham B15 2TT, UK; <sup>3</sup>Magus Strategic Communications Ltd, Marr House, Scagglethorpe, Malton YO17 8ED, UK

**Antibiotic resistance is now a linked global problem. Dispersion of successful clones of multidrug resistant (MDR) bacteria is common, often via the movement of people. Local evolution of MDR bacteria is also important under the pressure of excessive antibiotic use, with horizontal gene transfer providing the means by which genes such as *bla*<sub>CTX-M</sub> spread amongst different bacterial species and strains.  $\beta$ -Lactamase production is a common resistance mechanism in Gram-negative bacteria, and the rapid dissemination of novel genes reflects their evolution under the selective pressure of antibiotic usage. Many Enterobacteriaceae now carry broad-spectrum  $\beta$ -lactamases such as CTX-M, with particular genotypes associated with different geographical regions. The spread of these enzymes has compromised the clinical utility of a number of  $\beta$ -lactam classes and with the spread of genes such as *bla*<sub>KPC</sub>, carbapenems may be increasingly compromised in the future. High-level fluoroquinolone resistance (mainly caused by *gyrA* mutations) has also been shown to be associated with CTX-M and CMY-type enzymes, commonly due to co-carriage on conjugative plasmids of the gene for the aminoglycoside-inactivating enzyme AAC-6<sup>1</sup>-Ib-cr and *qnr* genes (which confer low-level resistance), allowing the easy selection of *gyrA* mutants in the host strain. Resistance in Gram-positive bacteria is also widely distributed and increasing, with the emergence of community-associated methicillin-resistant *Staphylococcus aureus* (MRSA) blurring the distinction between hospital and community strains. Antibiotic use and environmental factors all have a role in the emergence and spread of resistance. This article reviews some of the new mechanisms and recent trends in the global spread of MDR bacteria.**

Keywords: ESBLs, carbapenemases, Gram-positive bacteria, Gram-negative bacteria

### Introduction

Antimicrobial resistance increases the morbidity, mortality and costs of treating infectious diseases. The threat from resistance (particularly multiple resistance in bacterial strains that have disseminated widely) has never been so great. The key factors driving this threat are increased antibiotic usage (in both human and animal medicine), greater movement of people and increased industrialization. The emergence and global spread of the international clone 1 of penicillin-resistant *Streptococcus pneumoniae* (PRSP) is a good example of how multiresistant bacteria spread by the movement of people.<sup>1</sup> Furthermore, if total outpatient antibiotic consumption in different countries is correlated with the rate of PRSP, then a direct correlation is seen (Spearman coefficient  $r=0.75$ ;  $P<0.001$ ).<sup>2</sup> Horizontal gene transfer provides the single most important mechanism to accelerate the dispersal of antibiotic resistance genes. Although in the case of PRSP this occurs via transformation of DNA from

penicillin-resistant commensal streptococci, in most bacteria (particularly Gram-negative species) plasmids are the major vector. The importance of plasmids carrying multiple drug resistance (MDR) markers in *Shigella* spp. and *Escherichia coli* was first described in the seminal work of Watanabe in Japan over 40 years ago.<sup>3</sup> Plasmids are capable of self transfer (conjugation) between strains and species and have a mosaic structure that has arisen by recombination and transposition, which is responsible for the capture of different resistance genes, giving rise to the MDR phenotype.<sup>4</sup> This mosaic structure poses problems when classifying and studying the evolutionary relationships of plasmids.<sup>5</sup> The application of multilocus sequence typing (MLST) to Inc HII plasmids of *Salmonella enterica* serovar Typhi has circumvented these problems, as evolution by acquisition of single nucleotide polymorphisms in core genes is not subject to the exogenously driven variation seen in restriction fragment length polymorphism (RFLP) studies of plasmids.<sup>6</sup> The study found that resistance plasmids distributed throughout

\*Corresponding author. Tel: +44-121-424-1240; E-mail: peter.hawkey@heartofengland.nhs.uk

the world after 1993 were very different from those occurring before that time. This suggests that although antibiotic selection maintains the resistance genes, there is competition between plasmids of the same incompatibility group encoding the same phenotype. The interaction of plasmids with the host bacterium is poorly studied but it is crucial to understanding the rapid emergence and spread of MDR bacteria. MDR bacteria are usually thought of as being disadvantaged by carriage of antibiotic resistance genes. However, recent work using a pig gut model shows that no disadvantage (indeed sometimes even an advantage) is seen in MDR strains in the absence of antibiotic selection.<sup>7</sup>

## Resistance in Gram-negative bacteria

### *Extended-spectrum $\beta$ -lactamases*

The most important mechanism of resistance to  $\beta$ -lactam antibiotics among Gram-negative bacilli involves the production of  $\beta$ -lactamases. Extended-spectrum  $\beta$ -lactamases (ESBLs) are generally acquired by horizontal gene transfer and confer resistance to oxyimino-cephalosporins, some being mutant derivatives of established plasmid-mediated  $\beta$ -lactamases (e.g. TEM/SHV) or mobilized from environmental bacteria (e.g. CTX-M). The frequency with which novel enzymes have been described in the literature reflects not only the pace of discovery and the ability to differentiate these enzymes<sup>2</sup> but also their rapid emergence and evolution under the selective pressure of antibiotic usage. During the 1990s most reports of ESBLs concerned TEM/SHV types with the exception of the specific genotype CTX-M-2 from South America (five major families of CTX-M genotypes are recognized representing acquisition of  $\beta$ -lactamases genes from different species of *Kluyvera*).

Surveillance data reported high levels of ESBL-producing strains of *Klebsiella pneumoniae* and *E. coli* in Australasia, ranging from <10% in Australia and Japan to >30% in Singapore and China for *K. pneumoniae* and from ~11% in Singapore to 25% in China for *E. coli*.<sup>8</sup> Subsequent analysis of strains from China identified CTX-M-14 as the dominant genotype, which has been found particularly in the Far East but has also spread worldwide (Figure 1).<sup>9,10</sup> Particular CTX-M genotypes are associated with geographical regions (see above and Figure 1). CTX-M-15 is the only genotype reported from India<sup>11</sup> and is also very widely distributed across the world possibly because it is frequently carried by *E. coli* of sequence type (ST) 131, a very successful uropathogenic clone.<sup>12</sup> Very recently an outbreak of *Klebsiella* and *E. coli* producing CTX-M-15 has been reported from Southern China, where this genotype was extremely rare before, signifying potential extensive spread and displacement of the dominant CTX-M-14 and CTX-M-3 ESBLs.<sup>13</sup>

Since the turn of the century there have been dramatic shifts reported in both the prevalence and types of ESBLs reported in Europe, with strains producing CTX-M becoming dominant, particularly CTX-M-15 (Figure 1).<sup>14</sup> In some countries, reports of isolates producing CTX-M remain sporadic, while in Asia, much of Europe and South America, endemic prevalence has been reached.<sup>15</sup> In the USA, thought to have been spared a visitation from CTX-M, a survey undertaken in 2007 shows the globally dominant genotypes CTX-M-15 and -14 to be

appearing.<sup>16</sup> More recent data from the global Study for Monitoring Antimicrobial Resistance Trends (SMART) showed that in the Asia-Pacific region and in Latin America, 40% and 30% of *E. coli* and *Klebsiella* spp. respectively, from patients with intra-abdominal infections, were ESBL positive.<sup>17</sup>

### *AmpC enzymes*

AmpC cephalosporinases are species-specific chromosomally encoded  $\beta$ -lactams, common but not ubiquitous in Enterobacteriaceae and Pseudomonaceae, which have also become mobilized onto transmissible plasmids.<sup>18</sup> Consequently they can now appear in bacteria lacking or poorly expressing a chromosomal *bla*<sub>AmpC</sub> gene, such as *E. coli*, *K. pneumoniae* and *Proteus mirabilis*. Between 2005 and 2006, plasmid-mediated AmpC  $\beta$ -lactamases were identified in 10% of *Klebsiella* spp. and 2% of *E. coli* from five children's hospitals in China, with DHA-1-type AmpC enzymes having the highest prevalence rate.<sup>19</sup> This finding reflects the relentless spread of these  $\beta$ -lactamases, the most frequently reported type worldwide being CMY-2.<sup>18</sup>

### *Metallo- $\beta$ -lactamases*

The emergence of metallo- $\beta$ -lactamases (MBLs) with activity against carbapenems (e.g. the VIM and IMP families of enzymes) has compromised the clinical utility of this class of antibiotics.<sup>20,21</sup> Resistance to carbapenems may also be induced as a result of increased production of either AmpC or ESBL, coupled with a decrease in porin production or increased efflux.<sup>21,22</sup> Among 33 European countries participating in the European Antimicrobial Resistance Surveillance System (EARSS) in 2007, six countries reported carbapenem resistance rates of >25% among *Pseudomonas aeruginosa* isolates, the highest rate being reported from Greece (51%).<sup>23</sup> Greece also had the highest resistance rates among *K. pneumoniae* (46% to carbapenems, 58% to fluoroquinolones and 63% to third-generation cephalosporins). A recent review of the literature confirmed that VIM-2 is the most dominant MBL in *P. aeruginosa* and confers the greatest clinical threat.<sup>21</sup> VIM-2 has been reported from 37 countries across five continents (Figure 2). MBLs can hydrolyse all clinical  $\beta$ -lactam substrates, with the exception of aztreonam. The other major phylogenetic arm of the VIM MBLs, represented by VIM-1 and related genotypes, is now commonly found in Enterobacteriaceae (usually VIM-1), particularly from countries around the Mediterranean.<sup>21</sup> The gene for another mobile carbapenemase, *bla*<sub>SPM-1</sub>, has been found in 70% of isolates of *P. aeruginosa* from Brazil,<sup>21</sup> but to date has not been reported from other countries. Other currently rare carbapenemases include GIM-1, which has only been reported from a few *P. aeruginosa* isolates in Germany, SIM-1, which appears confined to *Acinetobacter baumannii* isolates in Korea, and NDM-1 in *K. pneumoniae* described in New Delhi.<sup>24</sup> Some countries with high rates of ESBL producers, such as India, have recently increased their usage of carbapenem antibiotics, which may provide a selective pressure for the spread of strains producing carbapenemases.

IMP carbapenemases were first reported in 1991 from Japan.<sup>21</sup> Other countries in which early molecular variants appeared were China, Taiwan, Italy, Portugal, Australia and Canada (Table 1). To date 24 *bla*<sub>IMP</sub> genes have been identified

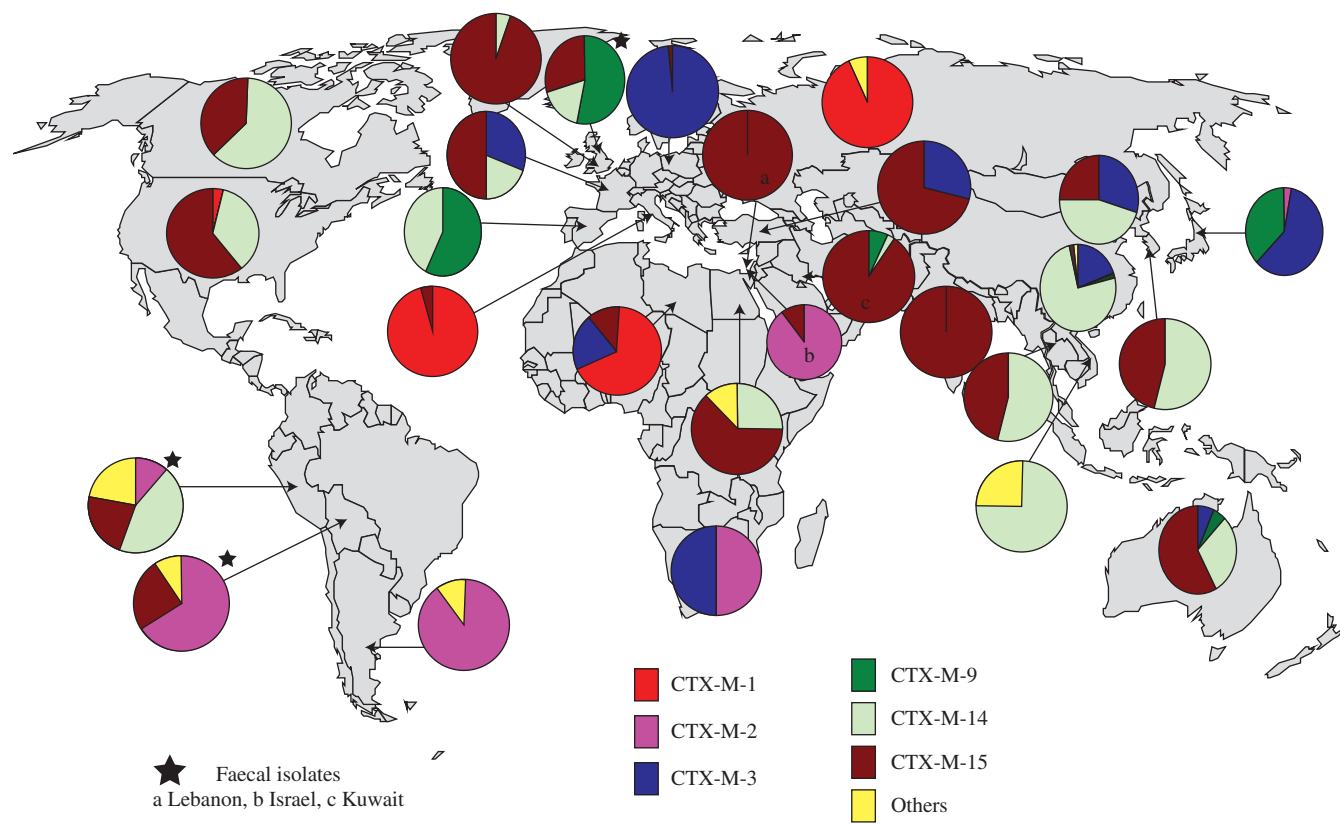

Figure 1. Global distribution of CTX-M genotypes.<sup>11,13,16,62-84</sup>

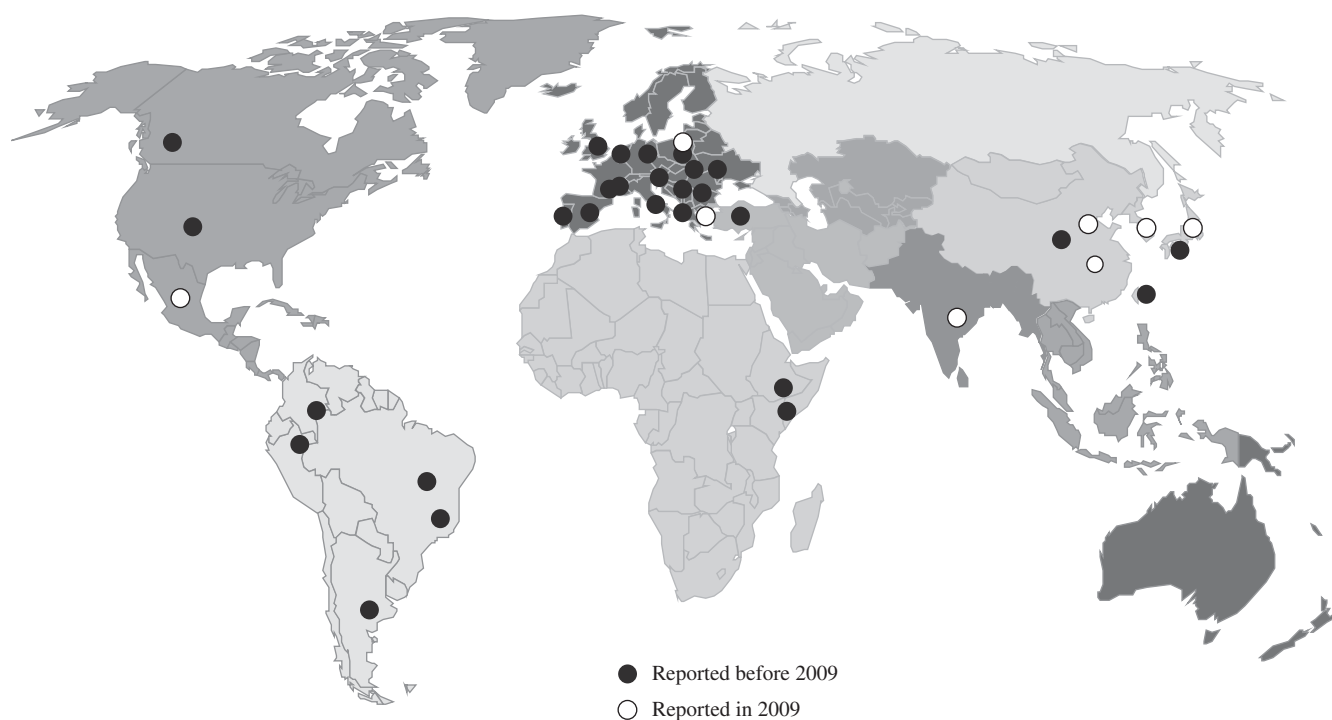

**Figure 2.** Global distribution of VIM-2.

**Table 1.** First observation and location of the earliest disseminated  $bla_{IMP}$  carbapenemases

| Reported | IMP type | Species                    | Country        | Reference |
|----------|----------|----------------------------|----------------|-----------|
| ~1991    | 1        | >12 species                | Japan          | 52        |
| 2000     | 2        | <i>Acinetobacter</i>       | Italy          | 53        |
| 2000     | 3        | <i>Shigella flexneri</i>   | Japan          | 54        |
| 2000     | 4        | <i>Citrobacter youngae</i> | Guangzhou, PRC | 55        |
| 2001     | 5        | <i>A. baumannii</i>        | Portugal       | 56        |
| 2000     | 6        | <i>Serratia marcescens</i> | Japan          | 57        |
| 2001     | 7        | <i>P. aeruginosa</i>       | Canada         | 58        |
| 2001     | 8        | <i>K. pneumoniae</i>       | Taiwan         | 59        |
| 2001     | 9        | <i>P. aeruginosa</i>       | Guangzhou, PRC | 60        |
| 2002     | 10       | <i>P. aeruginosa</i>       | Japan          | 61        |

(<http://www.lahey.org/Studies/other.asptable1>). In a recent outbreak of infection at an Australian hospital, which was part of a wider interstate outbreak, MBL-producing Gram-negative bacilli belonging to eight different genera carrying  $bla_{IMP-4}$  were reported.<sup>25</sup> Although the spread of MBL-producing organisms is often attributed to the use of broad-spectrum cephalosporins and carbapenems, in that report only 30% of the patients had intensive care unit (ICU)-related acquisition and only 10% of patients with non-ICU related acquisition had received carbapenems within the 2 weeks prior to the first positive sample. These authors postulated that an undetected environmental reservoir or significant number of colonized patients contributed to the outbreak.

#### Molecular class A carbapenem-hydrolysing enzymes

The appearance and rapid spread in the USA and Israel of KPC-type  $\beta$ -lactamases is the most recent development in the epidemiology of carbapenem resistance. In 2001, a carbapenem-resistant strain of *K. pneumoniae* was reported in North Carolina,<sup>26</sup> while in 2004, 19 isolates of carbapenem-resistant *Klebsiella* spp. possessing the carbapenem-hydrolysing class A  $\beta$ -lactamase KPC-2, were recovered from seven hospitals in New York City,<sup>27</sup> with another genotype, KPC-3, also being reported.<sup>28</sup> Since then, there have been increasing numbers of reports of KPC-containing organisms from different states in the USA (mainly confined to the Eastern seaboard but recently more widely),<sup>29,30</sup> KPC is endemic in Israel<sup>31</sup> and sporadic isolates have been reported in China<sup>32</sup> and Europe.

The rapid dissemination of different  $\beta$ -lactamases has severely complicated and limited antibiotic choices. Local knowledge of the epidemiology and characterization of resistance has become even more important when considering empirical therapy. Table 2 summarizes the susceptibilities of bacteria producing different  $\beta$ -lactamases.

#### Fluoroquinolone resistance

Fluoroquinolones interact with DNA gyrase and topoisomerase IV, the enzymes that regulate conformational changes in bacterial DNA during replication and transcription. Resistance to fluoroquinolones arises through stepwise mutations in the coding regions of the gyrase subunits (*gyrA* and *gyrB*) and DNA topoisomerase IV (*parC*). Accumulation of mutations in several of these genes increases the MIC in a stepwise manner.<sup>33</sup> In recent years, the plasmid-mediated QNR mechanism, which protects DNA from quinolone binding, has become a concern because of

## Changing epidemiology of resistance

**Table 2.** Susceptibility patterns usually observed in bacteria producing different  $\beta$ -lactamases

| Examples                       | AMP | TZP | RAD | CXM | CTX | FEP | ATM | IPM |
|--------------------------------|-----|-----|-----|-----|-----|-----|-----|-----|
| Class A                        |     |     |     |     |     |     |     |     |
| TEM1/SHV1                      | R   | S   | R   | S   | S   | S   | S   | S   |
| TEM3/CTX-M                     | R   | S   | R   | R   | R   | R   | R   | S   |
| KPC                            | R   | S   | R   | R   | R   | R   | R   | R   |
| Class B                        |     |     |     |     |     |     |     |     |
| VIM/IMP                        | R   | R   | R   | R   | R   | R   | S   | R   |
| Class C                        |     |     |     |     |     |     |     |     |
| chromosomal <sup>a</sup>       | R   | R   | R   | R   | R   | S   | R   | S   |
| CMY/FOX                        | R   | R   | R   | R   | R   | S   | R   | S   |
| Class D                        |     |     |     |     |     |     |     |     |
| OXA                            | R   | R   | R   | R   | S   | S   | S   | S   |
| OXA carbapenemase <sup>b</sup> | R   | R   | R   | R   | S   | S   | S   | R   |

<sup>a</sup>Derepressed mutant.

<sup>b</sup>e.g. OXA-23, OXA-51.

AMP, ampicillin; TZP, piperacillin/tazobactam; RAD, cefradine; CXM, cefuroxime; CTX, cefotaxime; FEP, cefepime; ATM, aztreonam; IPM, imipenem; R, resistant; S, susceptible.

its frequent association with CTX-M and CMY-type enzymes that inactivate third-generation cephalosporins.<sup>34</sup> In addition, the widely distributed plasmid-encoded aminoglycoside-modifying enzyme AAC-6<sup>1</sup>-Ib-cr has been found to degrade fluoroquinolones with a piperazinyl moiety (e.g. ciprofloxacin, norfloxacin).<sup>35</sup> There is also a plasmid-encoded target protection mechanism enabled by the *qnr* genes,<sup>35</sup> with both genes being found on plasmids carrying *bla*<sub>CTX-M</sub>. It is possible that the low-level plasmid-encoded fluoroquinolone resistance has provided a selective advantage for bacteria exposed to fluoroquinolones to allow the easier selection of high-level resistance mutations in *gyrA*, thus explaining the association of high-level chromosomal quinolone resistance with plasmid-encoded ESBL genes. Recent EARSS data show that fluoroquinolone resistance has increased significantly across the whole of Europe since 2001, with levels ranging from 7% (Estonia and Norway) to 53% (Turkey) in 2007.<sup>36</sup> Overall, only 47% of *E. coli* were susceptible to four classes of antibiotics in Europe in 2007, with the loss of susceptibility occurring more rapidly to fluoroquinolones than to any other antibiotic class included in the EARSS surveillance database.<sup>36</sup>

### Resistance in Gram-positive bacteria

Methicillin-resistant *Staphylococcus aureus* (MRSA) was first identified in the early 1960s coincident with the introduction of methicillin. Following a fall in incidence in the 1970s, a steady rise was noted in many countries. Analysis of clones from various parts of the world using MLST reveals a limited number of clones, many of which are also represented by identical clonal methicillin-susceptible *S. aureus* (MSSA) isolates, suggesting that successful MSSA lineages have acquired the mobile resistance determinant *SCCmec*.<sup>37</sup> A recent study using single nucleotide polymorphism analysis of sequence type 5 MRSA suggests that contrary to dogma, *SCCmec* acquisition is

at least 10-fold more common than thought and geographical dispersal is very restricted.<sup>38</sup>

In the late 1990s, levels of MRSA reached ~30% in many countries, and the first reports of community-associated MRSA (CA-MRSA) began to appear in the literature.<sup>39–41</sup> Cases of CA-MRSA usually present in younger patients without underlying risk factors, typically cause skin and soft tissue infections (SSTIs), are usually susceptible to ciprofloxacin, clindamycin, gentamicin and trimethoprim/sulfamethoxazole, with exotoxin genes (e.g. Panton–Valentine leukocidin genes), significantly more likely to be found than in hospital-acquired isolates.<sup>42</sup> These strains are genetically unrelated to hospital-acquired strains of MRSA and in some centres have emerged as the predominant cause of SSTIs, with the USA300 clone being the most frequently isolated in North America.<sup>43</sup>

CA-MRSA has diverse lineages due to new acquisitions of *SCCmec* IV. Epidemic strains have emerged in the South-West Pacific, North America, Europe and elsewhere.<sup>44,45</sup> Initially thought to be distinct from hospital-acquired strains, recent reports have indicated that these strains may now be causing hospital cross-infection and also may have reduced susceptibility to vancomycin.<sup>46</sup>

### Antibiotic resistance in the environment and animals

It is being increasingly recognized that MDR commensal bacteria in the gut of animals and humans are an important source of bacteria causing opportunistic infections or act as resistance gene reservoirs forming a source of spread to bacteria infecting humans. CTX-M-2 ESBL genes in *E. coli* in chicken meat imported into the UK were found in 50% of chicken breasts from Brazil this genotype is the most frequent in that country in humans.<sup>47</sup> Whilst an environmental origin for many antibiotic resistance genes seems likely (e.g. CTX-M from *Kluyvera*), release of antibiotics and other antibacterials into the



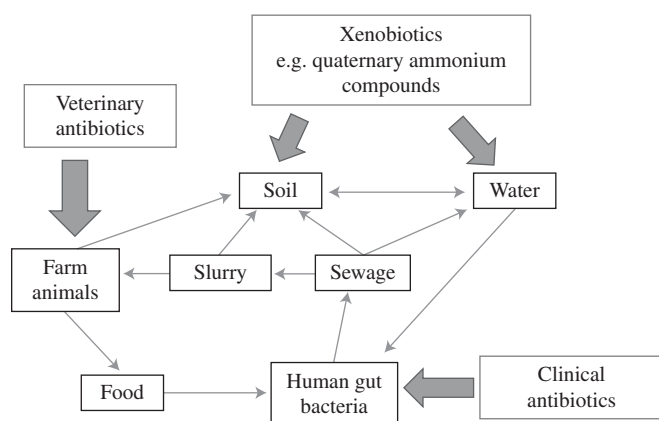

**Figure 3.** Flow of antibiotic resistance genes in *E. coli* in the biosphere. Thick arrows show major selective pressures on antibiotic resistance genes, thin arrows show the significant directions of gene flow.

environment is going to enrich both MDR and the vectors (plasmids and integrons) in that milieu. Release of fabric-conditioning chemicals (largely quaternary ammonium compounds) into a reed bed system has recently been shown to strongly select for Class I integron carriage, which is a key molecular mechanism for the spread of antibiotic resistance genes by horizontal gene transfer.<sup>48</sup> A model for the complex interlocking relationships of the sources and routes for MDR strain spread and horizontal gene transfer is shown in Figure 3. The MRSA clone ST398 and methicillin-susceptible ST9, which have their main reservoir in pigs, are increasingly causing infections in humans,<sup>49</sup> and ESBL genes of animal origin are being described in *E. coli* and *Salmonella* spp.<sup>50</sup>

## Conclusions

Although some antibiotic resistances have remained rare (for example intermediate vancomycin resistance and linezolid resistance in MRSA and also some resistance genes, e.g. VIM and IMP in the UK), the limited surveillance currently undertaken indicates a generalized rise in antibiotic resistance with some specific genes (for example those encoding CTX-M ESBLs) reaching pandemic proportions. Pressures, both clinical and commercial, to use antibiotics in both humans and animals, the global mobility of populations and food products, ensure that the spread of MDR bacterial clones and resistance genes will be a continuing phenomenon. Increased use of older agents offers little hope as has been seen with the emergence of colistin resistance in *Klebsiella* spp. in Greece.<sup>51</sup> A number of initiatives have been established to encourage the prudent use of antimicrobials. Even with the development of these programmes and the heightened awareness of the interplay between resistance, geography, treatment and transmission, it is likely that antibiotic resistance will continue to develop more rapidly than new agents to treat infections become available, and that at best we can only hope to slow the spread of these infections.

## Transparency declarations

None to declare.

## References

1. Klugman KP. The successful clone: the vector of dissemination of resistance in *Streptococcus pneumoniae*. *J Antimicrob Chemother* 2002; **50** Suppl S2: 1–5.
2. Albrich WC, Monnet DL, Harbarth S. Antibiotic selection pressure and resistance in *Streptococcus pneumoniae* and *Streptococcus pyogenes*. *Emerg Infect Dis* 2004; **10**: 514–7.
3. Watanabe T. Infective heredity of multiple drug resistance in bacteria. *Bacteriol Rev* 1963; **27**: 87–115.
4. Leplae R, Lima-Mendez G, Toussaint A. A first global analysis of plasmid encoded proteins in the ACLAME database. *FEMS Microbiol Rev* 2006; **30**: 980–94.
5. Osborn AM, da Silva Tatley FM, Steyn LM *et al*. Mosaic plasmids and mosaic replicons: evolutionary lessons from the analysis of genetic diversity in IncFII-related replicons. *Microbiology* 2000; **146**: 2267–75.
6. Phan MD, Kidgell C, Nair S *et al*. Variation in *Salmonella enterica* serovar typhi IncHI1 plasmids during the global spread of resistant typhoid fever. *Antimicrob Agents Chemother* 2009; **53**: 716–27.
7. Enne VI, Delsol AA, Davis GR *et al*. Assessment of the fitness impacts on *Escherichia coli* of acquisition of antibiotic resistance genes encoded by different types of genetic element. *J Antimicrob Chemother* 2005; **56**: 544–51.
8. Hirakata Y, Matsuda J, Miyazaki Y *et al*. Regional variation in the prevalence of extended-spectrum  $\beta$ -lactamase-producing clinical isolates in the Asia-Pacific region (SENTRY 1998–2002). *Diagn Microbiol Infect Dis* 2005; **52**: 323–9.
9. Chanawong A, M'Zali FH, Heritage J *et al*. Three cefotaximases, CTX-M-9, CTX-M-13, and CTX-M-14, among Enterobacteriaceae in the People's Republic of China. *Antimicrob Agents Chemother* 2002; **46**: 630–7.
10. Hawkey PM. Prevalence and clonality of extended-spectrum  $\beta$ -lactamases in Asia. *Clin Microbiol Infect* 2008; **14** Suppl 1: 159–65.
11. Ensor VM, Shahid M, Evans JT *et al*. Occurrence, prevalence and genetic environment of CTX-M  $\beta$ -lactamases in Enterobacteriaceae from Indian hospitals. *J Antimicrob Chemother* 2006; **58**: 1260–3.
12. Nicolas-Chanoine MH, Blanco J, Leflon-Guibout V *et al*. Intercontinental emergence of *Escherichia coli* clone O25:H4-ST131 producing CTX-M-15. *J Antimicrob Chemother* 2008; **61**: 273–81.
13. Liu W, Chen L, Li H *et al*. Novel CTX-M  $\beta$ -lactamase genotype distribution and spread into multiple species of Enterobacteriaceae in Changsha, Southern China. *J Antimicrob Chemother* 2009; **63**: 895–900.
14. Livermore DM, Canton R, Gniadkowski M *et al*. CTX-M: changing the face of ESBLs in Europe. *J Antimicrob Chemother* 2007; **59**: 165–74.
15. Canton R, Coque TM. The CTX-M  $\beta$ -lactamase pandemic. *Curr Opin Microbiol* 2006; **9**: 466–75.
16. Castanheira M, Mendes RE, Rhomberg PR *et al*. Rapid emergence of blaCTX-M among Enterobacteriaceae in U.S. Medical Centers: molecular evaluation from the MYSTIC Program (2007). *Microb Drug Resist* 2008; **14**: 211–6.
17. Guembe M, Cercenado E, Alcalá L *et al*. Evolution of antimicrobial susceptibility patterns of aerobic and facultative gram-negative bacilli causing intra-abdominal infections: results from the SMART studies 2003–2007. *Rev Esp Quimioter* 2008; **21**: 166–73.
18. Jacoby GA. AmpC  $\beta$ -lactamases. *Clin Microbiol Rev* 2009; **22**: 161–82.
19. Ding H, Yang Y, Lu Q *et al*. The prevalence of plasmid-mediated AmpC  $\beta$ -lactamases among clinical isolates of *Escherichia coli* and

## Changing epidemiology of resistance

*Klebsiella pneumoniae* from five children's hospitals in China. *Eur J Clin Microbiol Infect Dis* 2008; **27**: 915–21.

20. Hawkey P, Finch R. Tigecycline: *in-vitro* performance as a predictor of clinical efficacy. *Clin Microbiol Infect* 2007; **13**: 354–62.

21. Walsh TR. Clinically significant carbapenemases: an update. *Curr Opin Infect Dis* 2008; **21**: 367–71.

22. Mena A, Plasencia V, Garcia L *et al.* Characterization of a large outbreak by CTX-M-1-producing *Klebsiella pneumoniae* and mechanisms leading to *in vivo* carbapenem resistance development. *J Clin Microbiol* 2006; **44**: 2831–7.

23. Souli M, Galani I, Giamarellou H. Emergence of extensively drug-resistant and pandrug-resistant Gram-negative bacilli in Europe. *Euro Surveill* 2008; **13**: pii:19045.

24. Young D, Giske CG, Toleman M *et al.* (2008). A novel subgroup metallo- $\beta$ -lactamase (MBL), NDM-1 emerges in *Klebsiella pneumoniae* (KPN) from India. In: *Abstracts of the 48th International Conference on Antimicrobial Agents and Chemotherapy (ICAAC) and the Infectious Diseases Society of America (IDSA) 46th Annual Meeting, Washington DC, October 2008*. Abstract C1-105, p. 82. American Society for Microbiology, Washington DC, USA.

25. Herbert S, Halvorsen DS, Leong T *et al.* Large outbreak of infection and colonization with gram-negative pathogens carrying the metallo- $\beta$ -lactamase gene *bla*IMP-4 at a 320-bed tertiary hospital in Australia. *Infect Control Hosp Epidemiol* 2007; **28**: 98–101.

26. Yigit H, Queenan AM, Anderson GJ *et al.* Novel carbapenem-hydrolyzing  $\beta$ -lactamase, KPC-1, from a carbapenem-resistant strain of *Klebsiella pneumoniae*. *Antimicrob Agents Chemother* 2001; **45**: 1151–61.

27. Bradford PA, Bratu S, Urban C *et al.* Emergence of carbapenem-resistant *Klebsiella* species possessing the class A carbapenem-hydrolyzing KPC-2 and inhibitor-resistant TEM-30  $\beta$ -lactamases in New York City. *Clin Infect Dis* 2004; **39**: 55–60.

28. Woodford N, Tierno PM Jr, Young K *et al.* Outbreak of *Klebsiella pneumoniae* producing a new carbapenem-hydrolyzing class A  $\beta$ -lactamase, KPC-3, in a New York Medical Center. *Antimicrob Agents Chemother* 2004; **48**: 4793–9.

29. Rasheed JK, Biddle JW, Anderson KF *et al.* Detection of the *Klebsiella pneumoniae* carbapenemase type 2 carbapenem-hydrolyzing enzyme in clinical isolates of *Citrobacter freundii* and *K. oxytoca* carrying a common plasmid. *J Clin Microbiol* 2008; **46**: 2066–9.

30. Deshpande LM, Rhomberg PR, Sader HS *et al.* Emergence of serine carbapenemases (KPC and SME) among clinical strains of Enterobacteriaceae isolated in the United States Medical Centers: report from the MYSTIC Program (1999–2005). *Diagn Microbiol Infect Dis* 2006; **56**: 367–72.

31. Navon-Venezia S, Leavitt A, Schwaber MJ *et al.* First report on a hyperepidemic clone of KPC-3-producing *Klebsiella pneumoniae* in Israel genetically related to a strain causing outbreaks in the United States. *Antimicrob Agents Chemother* 2009; **53**: 818–20.

32. Mendes RE, Bell JM, Turnidge JD *et al.* Carbapenem-resistant isolates of *Klebsiella pneumoniae* in China and detection of a conjugative plasmid (*bla*KPC-2 plus *qnr*B4) and a *bla*IMP-4 gene. *Antimicrob Agents Chemother* 2008; **52**: 798–9.

33. Drlica K, Malik M. Fluoroquinolones: action and resistance. *Curr Top Med Chem* 2003; **3**: 249–82.

34. Lavilla S, Gonzalez-Lopez JJ, Sabate M *et al.* Prevalence of *qnr* genes among extended-spectrum  $\beta$ -lactamase-producing enterobacterial isolates in Barcelona, Spain. *J Antimicrob Chemother* 2008; **61**: 291–5.

35. Cattoir V, Nordmann P. Plasmid-mediated quinolone resistance in gram-negative bacterial species: an update. *Curr Med Chem* 2009; **16**: 1028–46.

36. EARSS. EARSS Annual report 2007. On-going surveillance of *S. pneumoniae*, *S. aureus*, *E. faecalis*, *E. faecium*, *E. coli*, *K. pneumoniae* and *P. aeruginosa* 2007; <http://www.rivm.nl/bibliotheek/rapporten/> (7 February 2009, date last accessed).

37. Robinson DA, Enright MC. Evolutionary models of the emergence of methicillin-resistant *Staphylococcus aureus*. *Antimicrob Agents Chemother* 2003; **47**: 3926–34.

38. Nubel U, Roumagnac P, Feldkamp M *et al.* Frequent emergence and limited geographic dispersal of methicillin-resistant *Staphylococcus aureus*. *Proc Natl Acad Sci USA* 2008; **105**: 14130–5.

39. Collignon P, Gosbell I, Vickery A *et al.* Community-acquired methicillin-resistant *Staphylococcus aureus* in Australia. Australian Group on Antimicrobial Resistance. *Lancet* 1998; **352**: 145–6.

40. Daum RS. Community-acquired methicillin-resistant *Staphylococcus aureus* infections. *Pediatr Infect Dis J* 1998; **17**: 745–6.

41. Centers for Disease Control and Prevention. Four pediatric deaths from community-acquired methicillin-resistant *Staphylococcus aureus*—Minnesota and North Dakota, 1997–1999. *JAMA* 1999; **282**: 1123–5.

42. Naimi TS, LeDell KH, Como-Sabetti K *et al.* Comparison of community- and health care-associated methicillin-resistant *Staphylococcus aureus* infection. *JAMA* 2003; **290**: 2976–84.

43. King MD, Humphrey BJ, Wang YF *et al.* Emergence of community-acquired methicillin-resistant *Staphylococcus aureus* USA 300 clone as the predominant cause of skin and soft-tissue infections. *Ann Intern Med* 2006; **144**: 309–17.

44. Kazakova SV, Hageman JC, Matava M *et al.* A clone of methicillin-resistant *Staphylococcus aureus* among professional football players. *N Engl J Med* 2005; **352**: 468–75.

45. Tristan A, Bes M, Meugnier H *et al.* Global distribution of Panton-Valentine leukocidin-positive methicillin-resistant *Staphylococcus aureus*, 2006. *Emerg Infect Dis* 2007; **13**: 594–600.

46. Rehm SJ. *Staphylococcus aureus*: the new adventures of a legendary pathogen. *Cleve Clin J Med* 2008; **75**: 177–80, 18376, 190–2.

47. Warren RE, Ensor VM, O'Neill P *et al.* Imported chicken meat as a potential source of quinolone-resistant *Escherichia coli* producing extended-spectrum  $\beta$ -lactamases in the UK. *J Antimicrob Chemother* 2008; **61**: 504–8.

48. Gaze WH, Abdoulsam N, Hawkey PM *et al.* Incidence of class 1 integrons in a quaternary ammonium compound-polluted environment. *Antimicrob Agents Chemother* 2005; **49**: 1802–7.

49. Kehrenberg C, Cuny C, Strommenger B *et al.* Methicillin-resistant and -susceptible *Staphylococcus aureus* strains of clonal lineages ST398 and ST9 from swine carry the multidrug resistance gene *cf*. *Antimicrob Agents Chemother* 2009; **53**: 779–81.

50. Garcia-Fernandez A, Chiaretto G, Bertini A *et al.* Multilocus sequence typing of *IncI1* plasmids carrying extended-spectrum  $\beta$ -lactamases in *Escherichia coli* and *Salmonella* of human and animal origin. *J Antimicrob Chemother* 2008; **61**: 1229–33.

51. Antoniadou A, Kontopidou F, Poulakou G *et al.* Colistin-resistant isolates of *Klebsiella pneumoniae* emerging in intensive care unit patients: first report of a multiclonal cluster. *J Antimicrob Chemother* 2007; **59**: 786–90.

52. Osano E, Arakawa Y, Wacharotayankun R *et al.* Molecular characterization of an enterobacterial metallo  $\beta$ -lactamase found in a clinical isolate of *Serratia marcescens* that shows imipenem resistance. *Antimicrob Agents Chemother* 1994; **38**: 71–8.

53. Riccio ML, Franceschini N, Boschi L *et al.* Characterization of the metallo- $\beta$ -lactamase determinant of *Acinetobacter baumannii* AC-54/97 reveals the existence of *bla*(IMP) allelic variants carried by gene cassettes of different phylogeny. *Antimicrob Agents Chemother* 2000; **44**: 1229–35.

54. Iyobe S, Kusadokoro H, Ozaki J *et al.* Amino acid substitutions in a variant of IMP-1 metallo- $\beta$ -lactamase. *Antimicrob Agents Chemother* 2000; **44**: 2023–7.
55. Hawkey PM, Xiong J, Ye H *et al.* Occurrence of a new metallo- $\beta$ -lactamase IMP-4 carried on a conjugative plasmid in *Citrobacter youngae* from the People's Republic of China. *FEMS Microbiol Lett* 2001; **194**: 53–7.
56. Da Silva GJ, Correia M, Vital C *et al.* Molecular characterization of bla(IMP-5), a new integron-borne metallo- $\beta$ -lactamase gene from an *Acinetobacter baumannii* nosocomial isolate in Portugal. *FEMS Microbiol Lett* 2002; **215**: 33–9.
57. Yano H, Kuga A, Okamoto R *et al.* Plasmid-encoded metallo- $\beta$ -lactamase (IMP-6) conferring resistance to carbapenems, especially meropenem. *Antimicrob Agents Chemother* 2001; **45**: 1343–8.
58. Gibb AP, Tribuddharat C, Moore RA *et al.* Nosocomial outbreak of carbapenem-resistant *Pseudomonas aeruginosa* with a new bla(IMP) allele, bla(IMP-7). *Antimicrob Agents Chemother* 2002; **46**: 255–8.
59. Yan JJ, Ko WC, Wu JJ. Identification of a plasmid encoding SHV-12, TEM-1, and a variant of IMP-2 metallo- $\beta$ -lactamase, IMP-8, from a clinical isolate of *Klebsiella pneumoniae*. *Antimicrob Agents Chemother* 2001; **45**: 2368–71.
60. Xiong J, Hynes MF, Ye H *et al.* bla(IMP-9) and its association with large plasmids carried by *Pseudomonas aeruginosa* isolates from the People's Republic of China. *Antimicrob Agents Chemother* 2006; **50**: 355–8.
61. Iyobe S, Kusadokoro H, Takahashi A *et al.* Detection of a variant metallo- $\beta$ -lactamase, IMP-10, from two unrelated strains of *Pseudomonas aeruginosa* and an *Alcaligenes xylooxidans* strain. *Antimicrob Agents Chemother* 2002; **46**: 2014–6.
62. Brigante G, Luzzaro F, Perilli M *et al.* Evolution of CTX-M-type  $\beta$ -lactamases in isolates of *Escherichia coli* infecting hospital and community patients. *Int J Antimicrob Agents* 2005; **25**: 157–62.
63. Cao V, Lambert T, Nhu DQ *et al.* Distribution of extended-spectrum  $\beta$ -lactamases in clinical isolates of Enterobacteriaceae in Vietnam. *Antimicrob Agents Chemother* 2002; **46**: 3739–43.
64. Chmelnitsky I, Carmeli Y, Leavitt A *et al.* CTX-M-2 and a new CTX-M-39 enzyme are the major extended-spectrum  $\beta$ -lactamases in multiple *Escherichia coli* clones isolated in Tel Aviv, Israel. *Antimicrob Agents Chemother* 2005; **49**: 4745–50.
65. Edelstein M, Pimkin M, Palagin I *et al.* Prevalence and molecular epidemiology of CTX-M extended-spectrum  $\beta$ -lactamase-producing *Escherichia coli* and *Klebsiella pneumoniae* in Russian hospitals. *Antimicrob Agents Chemother* 2003; **47**: 3724–32.
66. Empel J, Baraniak A, Literacka E *et al.* Molecular survey of  $\beta$ -lactamases conferring resistance to newer  $\beta$ -lactams in Enterobacteriaceae isolates from Polish hospitals. *Antimicrob Agents Chemother* 2008; **52**: 2449–54.
67. Ensor VM, Livermore DM, Hawkey PM. A novel reverse-line hybridization assay for identifying genotypes of CTX-M-type extended-spectrum  $\beta$ -lactamases. *J Antimicrob Chemother* 2007; **59**: 387–95.
68. Hernandez JR, Martinez-Martinez L, Canton R *et al.* Nationwide study of *Escherichia coli* and *Klebsiella pneumoniae* producing extended-spectrum  $\beta$ -lactamases in Spain. *Antimicrob Agents Chemother* 2005; **49**: 2122–5.
69. Kiratisin P, Apisarnthanarak A, Laesripa C *et al.* Molecular characterization and epidemiology of extended-spectrum- $\beta$ -lactamase-producing *Escherichia coli* and *Klebsiella pneumoniae* isolates causing health care-associated infection in Thailand, where the CTX-M family is endemic. *Antimicrob Agents Chemother* 2008; **52**: 2818–24.
70. Lartigue MF, Fortineau N, Nordmann P. Spread of novel expanded-spectrum  $\beta$ -lactamases in Enterobacteriaceae in a university hospital in the Paris area, France. *Clin Microbiol Infect* 2005; **11**: 588–91.
71. Lau SH, Kaufmann ME, Livermore DM *et al.* UK epidemic *Escherichia coli* strains A-E, with CTX-M-15  $\beta$ -lactamase, all belong to the international O25:H4-ST131 clone. *J Antimicrob Chemother* 2008; **62**: 1241–4.
72. Messai Y, Ibadene H, Benhassine T *et al.* Prevalence and characterization of extended-spectrum  $\beta$ -lactamases in *Klebsiella pneumoniae* in Algiers hospitals (Algeria). *Pathol Biol (Paris)* 2008; **56**: 319–25.
73. Mohamed Al-Agamy MH, El-Din Ashour MS, Wiegand I. First description of CTX-M  $\beta$ -lactamase-producing clinical *Escherichia coli* isolates from Egypt. *Int J Antimicrob Agents* 2006; **27**: 545–8.
74. Moubarek C, Daoud Z, Hakime NI *et al.* Countrywide spread of community- and hospital-acquired extended-spectrum  $\beta$ -lactamase (CTX-M-15)-producing Enterobacteriaceae in Lebanon. *J Clin Microbiol* 2005; **43**: 3309–13.
75. Munday CJ, Whitehead GM, Todd NJ *et al.* Predominance and genetic diversity of community- and hospital-acquired CTX-M extended-spectrum  $\beta$ -lactamases in York, UK. *J Antimicrob Chemother* 2004; **54**: 628–33.
76. Pallecchi L, Bartoloni A, Fiorelli C *et al.* Rapid dissemination and diversity of CTX-M extended-spectrum  $\beta$ -lactamase genes in commensal *Escherichia coli* isolates from healthy children from low-resource settings in Latin America. *Antimicrob Agents Chemother* 2007; **51**: 2720–5.
77. Paterson DL, Hujer KM, Hujer AM *et al.* Extended-spectrum  $\beta$ -lactamases in *Klebsiella pneumoniae* bloodstream isolates from seven countries: dominance and widespread prevalence of SHV- and CTX-M-type  $\beta$ -lactamases. *Antimicrob Agents Chemother* 2003; **47**: 3554–60.
78. Pitout JD, Church DL, Gregson DB *et al.* Molecular epidemiology of CTX-M-producing *Escherichia coli* in the Calgary Health Region: emergence of CTX-M-15-producing isolates. *Antimicrob Agents Chemother* 2007; **51**: 1281–6.
79. Quinteros M, Radice M, Gardella N *et al.* Extended-spectrum  $\beta$ -lactamases in Enterobacteriaceae in Buenos Aires, Argentina, public hospitals. *Antimicrob Agents Chemother* 2003; **47**: 2864–7.
80. Song W, Lee H, Lee K *et al.* CTX-M-14 and CTX-M-15 enzymes are the dominant type of extended-spectrum  $\beta$ -lactamase in clinical isolates of *Escherichia coli* from Korea. *J Med Microbiol* 2009; **58**: 261–6.
81. Yagi T, Kurokawa H, Shibata N *et al.* A preliminary survey of extended-spectrum  $\beta$ -lactamases (ESBLs) in clinical isolates of *Klebsiella pneumoniae* and *Escherichia coli* in Japan. *FEMS Microbiol Lett* 2000; **184**: 53–6.
82. Yu Y, Ji S, Chen Y *et al.* Resistance of strains producing extended-spectrum  $\beta$ -lactamases and genotype distribution in China. *J Infect* 2007; **54**: 53–7.
83. Yumuk Z, Afacan G, Nicolas-Chanoine MH *et al.* Turkey: a further country concerned by community-acquired *Escherichia coli* clone O25-ST131 producing CTX-M-15. *J Antimicrob Chemother* 2008; **62**: 284–8.
84. Zong Z, Partridge SR, Thomas L *et al.* Dominance of blaCTX-M within an Australian extended-spectrum  $\beta$ -lactamase gene pool. *Antimicrob Agents Chemother* 2008; **52**: 4198–202.
